# Supplementary material for: Determination of Five Sit-to-Stand Test Performance at Discharge of Stroke Patients
Source: MDPI journal article supplement (doi:10.3390/diagnostics14050521), 2024-02-29
Supplement: s1 [file s1]

**Table S1:** Linear regression covariates for the 5-STS test at discharge.

| Variables                              | Univariate Models  |         |
|----------------------------------------|--------------------|---------|
|                                        | B (95%CI)          | P-value |
| Demographics                           |                    |         |
| Age, y                                 | 0.102(0.01-0.18)   | 0.019   |
| Male                                   | -0.849(-3.17-1.47) | 0.468   |
| Stroke characteristics                 |                    |         |
| Side affected (right)                  | 0.622(-1.67-2.92)  | 0.589   |
| Type of stroke (ischemic)              | 1.10(0.32-3.80)    | 0.871   |
| Time from stroke to admission PT, days | 0.068(0.03-0.10)   | <0.001  |

5-STS indicates five-repetition sit-to-stand; PT, physical therapy, CI, confident interval.

**Table S2.** Lineal regression covariates with changes in the 5-STS test at discharge.

| Variables                              | Univariate Models with T0 |         | Univariate Models with T1 |         |
|----------------------------------------|---------------------------|---------|---------------------------|---------|
|                                        | measure                   |         | measure                   |         |
|                                        | B (95%CI)                 | P-value | B (95%CI)                 | P-value |
| Demographics                           |                           |         |                           |         |
| Age, y                                 | 0.058(-0.04-0.15)         | 0.253   | 0.016(-0.03-0.06)         | 0.540   |
| Male                                   | 0.852(-1.82-3.52)         | 0.525   | 0.709(-0.64-2.05)         | 0.297   |
| Stroke characteristics                 |                           |         |                           |         |
| Side affected (right)                  | -0.469(-3.18-2.16)        | 0.723   | -0.122(-1.46-1.22)        | 0.857   |
| Type of stroke (ischemic)              | -1.67(-4.68-1.34)         | 0.271   | -0.127(-1.67-1.42)        | 0.870   |
| Time from stroke to admission PT, days | -0.006(-0.05-0.03)        | 0.801   | -0.007(-0.03-0.01)        | 0.504   |

5-STS indicates five-repetition sit-to-stand; PT, physical therapy, CI, confident interval.
